# Supplementary material for: Investigation of the Serotonergic Activity and the Serotonin Content in Serum and Platelet, and the Possible Role of the Serotonin Transporter in Patients with Depression
Source: MDPI journal article supplement (doi:10.3390/bs12060178), 2022-06-03
Supplement: s1 [file s1]

**Table S1.** Data from the serotonin content (platelet/serum), LDAEP (cortical/source), psychometric questionnaires (HAMD-21, BDI-II, STAI-X1, STAI-X2), and genotyping of all participants.

| Participant ID | Platelet serotonin (10 <sup>9</sup> /Thr) | Serum serotonin (ng/ml) | Cortical LDAEP | Source LDAEP (left) | Source LDAEP (right) | HAMD-21 | BDI-II | STAI-X1 | STAI-X2 | 5-HTTLPR genotype |
|----------------|-------------------------------------------|-------------------------|----------------|---------------------|----------------------|---------|--------|---------|---------|-------------------|
| P001           | 53327.46*                                 | 14.89                   | 0.29           | 0.66                | 0.23                 | 8       | 23     | 51      | 52      | LS                |
| P002           | 41.62*                                    | 19.43                   | 0.19           | 0.31                | 0.13                 | 0       | 39     | 49      | 57      | LL                |
| P003           | 60124.45*                                 | 39.7                    | 0.26           | 0.43                | 0.19                 | 17      | 29     | 65      | 63      | LL                |
| P004           | 1801.23                                   | 631.95                  | 0.2            | 0.2                 | 0.17                 | 13      | 45     | 93      | 77      | SS                |
| P005           | 625.32                                    | 223.69                  | 0.43           | 0.32                | 0.35                 | 24      | 36     | 73      | 63      | LS                |
| P006           | 227.75*                                   | 1071.04                 | 0.13*          | 0.12*               | 0.08*                | 24      | 29     | 37      | 47      | LL                |
| P007           | 1376.55                                   | 638.77                  | 0.57           | 0.21                | 0.43                 | 18      | 33     | 60      | 61      | LL                |
| P008           | 217.34*                                   | 68.49                   | 0.4            | 0.6                 | 1.29                 | 22      | 40     | 64      | 71      | LS                |
| P009           | 961.4                                     | 857.42                  | 0.04*          | -0.02*              | 0.03*                | 23      | 38     | 47      | 60      | SS                |
| P010           | 903.43                                    | 46.29                   | 0.37           | 0.09                | 0.2                  | 19      | 37     | 63      | 58      | SS                |
| P011           | 714.83*                                   | 67.8                    | 0.28*          | 0.36*               | 0.08*                | 16      | 36     | 45      | 58      | LS                |
| P012           | 1144.28                                   | 1255.61                 | 0.52*          | 0.37*               | 0.22*                | 14      | 31     | 55      | 48      | LL                |
| P013           | 907.18                                    | 116.21                  | 0.12           | 0.05                | 0.04                 | 13      | 23     | 48      | 46      | SS                |
| P014           | 1361.95                                   | 836.35                  | 0.37           | 0.36                | 0.13                 | 31      | 52     | 71      | 70      | LS                |
| P015           | 174.29                                    | 350.44                  | 0.78*          | 0.45*               | 0.82*                | 21      | 45     | 73      | 65      | LL                |
| P016           | 1027.34                                   | 17.69                   | 0.12           | -0.16               | 0.06                 | 20      | 37     | 62      | 64      | SS                |
| P017           | 129.85                                    | 186.16                  | 0.21           | 0.24                | 0.2                  | 22      | 51     | 73      | 75      | LL                |
| P018           | 859.58                                    | 128.37                  | 0.25           | -0.03               | 0.04                 | 24      | 42     | 69      | 67      | LL                |
| P019           | 129.85                                    | 74.32                   | -              | -                   | -                    | 12      | 23     | 51      | 54      | LL                |
| P020           | 521.3*                                    | 942.8*                  | 0.2*           | 1.3*                | 0.17*                | 23      | 33     | 58      | 52      | LS                |
| P021           | 204.64                                    | 1186.09                 | 0.33           | 0.2                 | 0.43                 | 18      | 39     | 61      | 69      | SS                |
| P022           | 1467.49                                   | 559.4                   | 0.12           | 0.06                | 0.03                 | 3       | 24     | 55      | 66      | LL                |
| P023           | 1027.34                                   | 111.49                  | 0.41           | 0.17                | 0.13                 | 20      | 33     | 60      | 57      | LS                |
| P024           | 1172.64                                   | 829.91                  | 0.12*          | 0                   | 0.06*                | 15      | 16     | 64      | 65      | LS                |
| P025           | 714.83                                    | 715.78                  | 0.55           | 0.36                | 0.29                 | 15      | 33     | 52      | 63      | LL                |
| P026           | 870.34                                    | 1276.61                 | 0.56           | 0.29                | 0.29                 | 20      | 33     | 64      | 69      | LS                |

|      |           |         |       |       |        |    |    |    |    |    |
|------|-----------|---------|-------|-------|--------|----|----|----|----|----|
| P027 | 1431.43   | 48.45   | 0.07* | 0.13* | -0.02* | 11 | 17 | 58 | 57 | SS |
| P028 | -         | 451.59  | 0.21  | 0.19  | 0.08   | 20 | 30 | 72 | 69 | LS |
| P029 | 276.51    | 73.69   | 0.68  | 0.7   | 0.38   | 24 | 37 | 54 | 63 | LL |
| P030 | 1879.06   | 31.95   | 0.23  | 0.44  | 0.25   | 15 | 12 | 44 | 55 | LS |
| P031 | 2228.6    | 243.95  | 0.36* | 0.17* | 0.04*  | 23 | 46 | 71 | 63 | LL |
| P032 | 1695.33   | 168.45  | 0.07  | 0.15  | 0.05   | 24 | 52 | 56 | 68 | LS |
| P033 | 3654.1    | 11.57   | 0.38* | 0.07* | 0.08*  | 22 | 36 | 55 | 57 | LL |
| P034 | 536.16*   | 52.27   | -     | -     | -      | 12 | 6  | 31 | 45 | SS |
| P035 | 271.01    | 84.86   | 0.18* | 0.2*  | 0.19*  | 19 | 35 | 60 | 58 | LL |
| P036 | 1823.42   | 250.26  | 0.41  | 0.3   | 0.15   | 18 | 42 | 47 | 68 | LL |
| P037 | 3.06      | 10.65   | 0.1   | 0.14  | 0.23   | 20 | 47 | 66 | 74 | LL |
| P038 | 1335.63   | 38.86   | 0.16* | 0.12* | 0.1*   | 10 | 29 | 41 | 58 | LL |
| P039 | 525.46    | 64.58   | 0.64  | 0.73  | 0.54   | 20 | 38 | 61 | 54 | LL |
| P040 | 1212.52   | 1093.12 | 0.31  | 0.21  | 0.1    | 19 | 31 | 53 | 55 | LS |
| P041 | 40586.16* | 13.16   | -     | -     | -      | 24 | 24 | 56 | 54 | SS |
| P042 | 1450.64   | 239.46  | 0.1*  | 0.09* | 0.07*  | 19 | 25 | 40 | 48 | LS |
| P043 | 4861.2    | 11.2    | 0.11  | 0.1   | 0.22   | 14 | 52 | 60 | 71 | LS |
| P044 | 210.19    | 254.11  | 0.3   | 0.24  | 0.27   | 21 | 43 | 64 | 70 | LL |
| P045 | 174.29    | 38.68   | 0.22  | 0.24  | 0.11   | 19 | 50 | 73 | 57 | SS |
| P046 | 11588.33* | 9.37    | 0.23  | 0.13  | 0.06   | 22 | 43 | 75 | 69 | SS |
| P047 | 1534.12   | 214.11  | 0.03  | 0.02  | 0.16   | 15 | 20 | 29 | 56 | LL |
| P048 | 1245.4    | 30.9    | -0.01 | 0.05  | 0.09   | 28 | 43 | 56 | 66 | LL |
| P049 | 342.5     | 30.43   | 0.2   | 0.14  | 0.08   | 21 | 33 | 63 | 70 | LL |
| P050 | 3214.31   | 9.1     | 0.19  | 0.1   | 0.1    | 22 | 41 | 69 | 71 | LL |
| P051 | 143.56    | 159.74  | -     | -     | -      | 22 | 30 | 56 | 62 | LS |
| P052 | 3099.19   | 18.82   | 0.33  | 0.21  | 0.25   | 16 | 45 | 76 | 77 | LL |
| P053 | 588.79    | 106.21  | 0.13  | 0.12  | 0.11   | 19 | 24 | 61 | 54 | LS |
| P054 | 467.11    | 130.77  | 0.13* | 0.06* | 0.05*  | 7  | 21 | 44 | 64 | LS |
| P055 | 1744.28   | 66.55   | 0.1*  | 0.14* | 0.19*  | 17 | 36 | 43 | 66 | LL |
| P056 | 1077.32   | 119.47  | 0.56  | 0.3   | 0.12   | 23 | 44 | 57 | 65 | SS |
| P057 | 529.03    | 74.51   | 0.61* | 0.08* | 0.04*  | 18 | 40 | 61 | 76 | SS |

|      |          |        |       |       |        |    |    |    |    |    |
|------|----------|--------|-------|-------|--------|----|----|----|----|----|
| P058 | 4761.68  | 12.67  | -0.01 | 0.04  | 0.12   | 19 | 31 | 69 | 60 | SS |
| P059 | 1146.17  | 124.5  | -     | -     | -      | 19 | 17 | 48 | 46 | LS |
| P060 | -        | 256.57 | 0.28  | 0.22  | 0.17   | 14 | 40 | 70 | 66 | LS |
| P061 | -        | 125.8  | 0.06  | 0.09  | -0.32  | 21 | 24 | 57 | 65 | SS |
| P062 | -        | 16.01  | 0.14  | 0.11  | 1.21   | 21 | 32 | 47 | 43 | LL |
| P063 | 1875.02  | 515.86 | 0.04  | 0     | 0.08   | 17 | 33 | 41 | 60 | LS |
| P064 | -        | -      | 0.18  | 0.26  | 0.12   | 24 | 15 | 41 | 51 | LS |
| P065 | -        | 970    | 0.1   | 0.09  | 0.11   | 6  | 5  | 29 | 31 | LL |
| P066 | 1071.64  | 350.46 | -     | -     | -      | 23 | 22 | 70 | 61 | LS |
| P067 | 536.63   | 82.76  | 0.28* | 0.17* | 0.12*  | 24 | 41 | 44 | 62 | LS |
| P068 | 1600.69* | 126.68 | 0.81  | 0.5   | 0.5    | 14 | 42 | 58 | 69 | SS |
| P069 | 434.9    | 563.97 | 0.14  | -0.07 | 0.06   | 23 | 32 | 47 | 52 | LS |
| P070 | 2013.18  | 511.19 | 0.13  | 0.11  | -0.01  | 26 | 41 | 42 | 62 | LS |
| P071 | 525.46   | 212.66 | 0.23  | 0.06  | 0.15   | 18 | 35 | 56 | 67 | LS |
| P072 | 767.11   | 9.36   | 0.57* | 0.25* | 0.32*  | 18 | 31 | 33 | 38 | LL |
| P073 | 272.73   | 5.27   | 0.33  | 0.97  | 0.23   | 20 | 35 | 51 | 67 | LS |
| P074 | 626.94   | 6.02   | 0.19  | 0.2   | 0.14   | 17 | 33 | 35 | 62 | LS |
| P075 | 427.64   | 5.97   | 0.17  | 0.24  | 0.07   | 20 | 8  | 48 | 57 | LS |
| P076 | 416.99   | 20.63  | 0.38* | 0.43* | 0.09*  | 16 | 32 | 40 | 38 | LS |
| P077 | 295.41   | 5.59   | 0.19  | 0.12  | 0.07   | 18 | 36 | 42 | 57 | LS |
| P078 | 61.58    | 6.46   | 0.35  | 0.23  | 0.32   | 16 | 33 | 54 | 49 | LL |
| P079 | 1856.97  | 8.16   | 0.47* | 0.62* | 0.56*  | 22 | 39 | 74 | 72 | LS |
| P080 | 1209.87  | 97.66  | -0.01 | 0.11  | 0      | 19 | 40 | 42 | 63 | LS |
| P081 | 1229.59  | 16.51  | 0.33  | 0.04  | 0.14   | 15 | 30 | 55 | 61 | SS |
| P082 | 791.45   | 34.64  | 0.17  | 0.04  | 0.14   | 19 | 25 | 39 | 56 | SS |
| P083 | 667.88   | 20.52  | 0.14  | 0.14  | 0.22   | 21 | 42 | 53 | 64 | SS |
| P084 | 830.79   | 10.97  | 0.08* | 0.08* | 0.05*  | 27 | 28 | 58 | 65 | LS |
| P085 | 766.27   | 236.66 | 0.16  | 0.17  | 0.13   | 17 | 44 | 52 | 68 | LS |
| P086 | 657.17   | 122.53 | 0.19* | 0.02* | -0.04* | 15 | 16 | 37 | 44 | LL |
| P087 | 582.13   | 29.52  | 0.17* | 0.06* | 0.07*  | 22 | 31 | 54 | 65 | LL |
| P088 | 681.52   | 44.4   | -     | -     | -      | 25 | 49 | 70 | 71 | SS |

|       |          |         |       |        |        |    |    |    |    |    |
|-------|----------|---------|-------|--------|--------|----|----|----|----|----|
| P089  | 487.29   | 55.36   | 0.02  | 0.04   | 0.03   | 17 | 25 | 56 | 61 | SS |
| HP001 | 1143.57  | 538.95  | 0.49* | 0.66*  | 0.46*  | 5  | 6  | 36 | 34 | LL |
| HP002 | 1051.36  | 255.17  | 0.22  | 0.25   | 0.11   | 0  | 1  | 25 | 25 | SS |
| HP003 | 1530.36  | 600.34  | 0.47  | 0.33   | 0.16   | 4  | 3  | 30 | 32 | SS |
| HP004 | 2551.39  | 791.88  | 0.13  | 0.2    | 0.31   | 1  | 0  | 28 | 32 | LS |
| HP005 | 780.37   | 864.32  | 0.28  | 0.16   | 0.07   | 3  | 0  | 27 | 26 | LS |
| HP006 | 926.8    | 737.51  | 0.26  | 0.4    | 0.22   | 0  | 6  | 30 | 33 | LL |
| HP007 | 1822.78  | 683.13  | 0.29  | 0.08   | 0.25   | 0  | 1  | 25 | 22 | SS |
| HP008 | 1039.38  | 1001.9  | 0.45  | 0.24   | 0.1    | 0  | 5  | 32 | 36 | LS |
| HP009 | -        | -       | -     | -      | -      | 0  | 0  | 36 | 32 | SS |
| HP010 | 1043.36  | 567.18  | 0.37  | 0.27   | 0.2    | 4  | 7  | 38 | 34 | LL |
| HP011 | 1682.22  | 1398.81 | 0.29* | 0.34*  | 0.14*  | 1  | 4  | 34 | 40 | LS |
| HP012 | 1901.03  | 915.16  | 0.48  | 0.23   | 0.42   | 1  | 0  | 23 | 28 | LS |
| HP013 | 1546.57  | 1161.38 | 0.53  | 0.04   | 0.35   | 0  | 1  | 36 | 31 | SS |
| HP014 | -        | 561.01  | 0.06  | 0.11   | 0.1    | 1  | 4  | 35 | 32 | SS |
| HP016 | 1015.82  | -       | 0.37* | 0.28*  | 0.4*   | 2  | 3  | 34 | 34 | LS |
| HP018 | 1059.43  | 948.03  | 0.13* | 0.57*  | 0.37*  | 3  | 15 | 48 | 49 | LS |
| HP019 | 1612.97  | 1324.34 | 0.77  | 1.39   | 1.24   | 4  | 0  | 37 | 32 | LS |
| HP020 | 1221.53* | 933.12  | 0.18  | 0.21   | 0.46   | 0  | 0  | 41 | 35 | LS |
| HP021 | 3036.91* | 1219.28 | 0.01  | 0.09   | -0.16  | 4  | 2  | 23 | 25 | LL |
| HP023 | 1494.29  | -       | 0.38  | 0.44   | 0.85   | 0  | 1  | 26 | 30 | LL |
| HP024 | -        | 1335.98 | 0.32* | 0.25*  | 0.14*  | 0  | 3  | 34 | 35 | LS |
| HP025 | -        | 1346.25 | 0.41  | 0.26   | 0.19   | 0  | 0  | 25 | 31 | LL |
| HP026 | -        | 324.24  | 0.25* | 0.19*  | 0.12*  | 0  | 0  | 27 | 23 | SS |
| HP029 | -        | -       | 0.18  | 0.04   | 0.1    | 7  | 11 | 37 | 40 | SS |
| HP031 | -        | -       | 0.24* | -0.02* | -0.01* | 0  | 0  | 22 | 22 | LS |
| HP032 | -        | 2040.33 | -     | -      | -      | 6  | 9  | 34 | 53 | LL |
| HP033 | 3612.44  | 657.47  | 0.39  | 0.16   | 0.8    | 0  | 0  | 35 | 32 | LL |
| HP035 | 1916.76  | -       | 0.09* | 0.09*  | -0.03* | 0  | 0  | 30 | 29 | LL |
| HP036 | 1432.78  | 717.87  | 0.34  | 0.42   | 0.21   | 1  | 6  | 47 | 37 | SS |
| HP037 | 4224.82  | 850.25  | 0.22  | 0.2    | 0.23   | 2  | 0  | 32 | 35 | SS |

|       |          |         |        |       |       |   |    |    |    |    |
|-------|----------|---------|--------|-------|-------|---|----|----|----|----|
| HP039 | 2630.6   | 1970.58 | 0.09   | 0.07  | 0.16  | 2 | 7  | 39 | 37 | LL |
| HP041 | 571.8    | 1029.68 | -      | -     | -     | 0 | 6  | 41 | 42 | LL |
| HP042 | 2299.59  | 855.56  | 0.23   | 0.3   | 0.16  | 0 | 1  | 28 | 28 | SS |
| HP044 | 1288.39  | 1527.13 | 0.4    | 0.33  | 0.24  | 4 | 3  | 55 | 47 | LS |
| HP045 | 1288.68  | 30.72   | 0.07*  | 0.05* | 0.04* | 0 | 0  | 29 | 29 | LS |
| HP046 | 688.01*  | 302.31  | 0.21   | 0.08  | 0     | 0 | 0  | 25 | 23 | SS |
| HP047 | 980.69   | 37.71   | 0.41   | 0.48  | 0.26  | 0 | 0  | 23 | 27 | LL |
| HP048 | 2118.64  | 188.11  | 0.1    | 0.02  | 0.09  | 1 | 9  | 34 | 34 | SS |
| HP049 | 848.29*  | 801.01  | 0.42   | 0.24  | 0.52  | 0 | 6  | 32 | 38 | LS |
| HP050 | 680.13   | 1546.4  | -0.04* | 0.16* | 0.09* | 2 | 3  | 32 | 30 | SS |
| HP051 | 3001.04* | 226.65  | 0.18   | 0.12  | 0.13  | 0 | 2  | 29 | 27 | LL |
| HP052 | 2942.81  | 1536.85 | -      | -     | -     | 0 | 0  | 27 | 23 | LL |
| HP053 | 3609.97  | 1197.95 | 0.27*  | 0.32* | 0.11* | 0 | 0  | 21 | 21 | LL |
| HP054 | 3127.54  | 87.06   | 0.42*  | 0.85* | 0.75* | 0 | 0  | 30 | 26 | LL |
| HP055 | 754.44   | 964.8   | 0.44   | 0.24  | 0.08  | 1 | 0  | 20 | 20 | SS |
| HP056 | 3495.62* | 1423.98 | 0.24   | 0.16  | 0.22  | 1 | 5  | 23 | 33 | SS |
| HP057 | 3270.79  | 1730.99 | 0.24*  | 0.08* | 0.09* | 1 | 8  | 40 | 37 | LS |
| HP058 | 3273.08  | 1540.08 | 0.28   | 0.14  | 0.07  | 4 | 6  | 33 | 32 | LS |
| HP059 | 4088.83  | 1164.89 | 0.25   | 0.13  | 0.07  | 0 | 10 | 33 | 27 | LS |
| HP060 | 3026.35  | 291.03  | 0.15   | 0.04  | -0.06 | 0 | 2  | 49 | 27 | LL |
| HP061 | 2755.47  | 4.18    | 0.43   | 0.39  | 0.22  | 4 | 12 | 26 | 39 | SS |
| HP062 | 3530.03  | 440.09  | 0.18*  | 0.07* | 0.05* | 1 | 2  | 42 | 29 | LL |
| HP063 | 3110.08  | 593.36  | -      | -     | -     | 2 | 19 | 34 | 30 | LS |
| HP064 | 4385.21  | 956.27  | 0.29   | 0.08  | 0.12  | 0 | 1  | 30 | 29 | LS |
| HP065 | 3107.9   | 2946.23 | 0.12   | 0.04  | 0.03  | 0 | 0  | 27 | 28 | LS |
| HP066 | 4877.36  | 3029.86 | 0.18   | 0.06  | 0.12  | 0 | 4  | 33 | 36 | LS |
| HP067 | 2140.34  | 266.84  | 0.26   | 0.09  | 0.11  | 0 | 0  | 29 | 30 | LS |
| HP068 | 9689.9*  | 636.36  | 0.24   | 0.26  | -0.06 | 1 | 7  | 31 | 29 | LS |
| HP069 | 3218.57  | 981.35  | 0.41   | 0.29  | 0.06  | 4 | 5  | 28 | 32 | LL |
| HP070 | 2311.61  | 303.72  | 0.27   | 0.25  | 0.2   | 0 | 10 | 41 | 37 | LS |
| HP071 | 3105.23  | 371.49  | 0.27   | -0.02 | -0.08 | 2 | 6  | 41 | 37 | LS |

|       |          |         |       |        |       |    |    |    |    |    |
|-------|----------|---------|-------|--------|-------|----|----|----|----|----|
| HP072 | 1993.56* | 710.27  | 0.27* | 0.23*  | 0.05* | 4  | 9  | 33 | 47 | LS |
| HP073 | 2191.08  | 522.56  | 0.24* | 0.37*  | 0.25* | 0  | 0  | 35 | 27 | LS |
| HP074 | 2189.39  | 279.76  | 0.14  | 0.36   | 0.2   | 4  | 8  | 30 | 30 | LL |
| HP075 | 2170.98  | 557.52  | 0.3   | 0.16   | 0.23  | 1  | 5  | 28 | 39 | LL |
| HP076 | 1498.69  | 404.9   | 0.49* | -0.18* | 0.76* | 0  | 6  | 39 | 35 | LS |
| HP077 | 1879.08  | 1014.11 | 0.29  | 0.38   | 0.28  | 2  | 0  | 26 | 30 | LS |
| HP078 | 4282.44* | 221.73  | 0.16  | 0.08   | 0.16  | 1  | 1  | 34 | 27 | LS |
| HP079 | 1160.47  | 404.11  | 0.2   | 0.05   | 0.02  | 2  | 2  | 35 | 32 | LL |
| HP080 | 2865.75  | 312.11  | 0.36* | 0.31*  | 0.48* | 0  | 1  | 30 | 28 | SS |
| HP081 | 1108.2   | 54.86   | 0.15  | 0.08   | 0.11  | 0  | 5  | 59 | 36 | LL |
| HP082 | 981.94   | 334.28  | 0.18  | 0.28   | 0.7   | 1  | 5  | 30 | 29 | LL |
| HP083 | 360.68   | 293.87  | 0.19  | 0.4    | 0.68  | 12 | 35 | 34 | 59 | LL |
| HP084 | 2942.7   | 257.17  | 0.13  | 0.29   | 0.17  | 2  | 6  | 33 | 31 | SS |
| HP085 | 1073.85  | 35.76   | 0.14  | 4.17   | 3.9   | 3  | 10 | 39 | 40 | LS |
| HP086 | 1876.92  | 89.16   | 0.22  | 0.12   | 0.16  | 3  | 0  | 36 | 30 | LS |
| HP087 | 2346.99  | 468.4   | 0.14  | 0.12   | 0.36  | 0  | 0  | 32 | 37 | LS |
| HP088 | 2514.97  | 246.73  | -     | -      | -     | 1  | 0  | 32 | 21 | SS |
| HP089 | 1360.97  | 187.99  | 0.28  | 0.79   | 0.68  | 0  | 4  | 29 | 30 | SS |
| HP090 | 1326.79  | 791.4   | 0.08  | 0.04   | -0.04 | 2  | 7  | 33 | 42 | LL |
| HP091 | 890.11   | 346.66  | -     | -      | -     | 0  | 0  | 25 | 28 | LS |
| HP092 | 2240.36  | 270.69  | 0.28  | 0.39   | 0.16  | 0  | 0  | 32 | 26 | LS |
| HP093 | 945.45   | 438.57  | 0.2   | 0.1    | 0.09  | 2  | 0  | 34 | 35 | LS |
| HP094 | 1283.45  | 605.53  | 0.33  | 0.21   | 0.13  | 5  | 3  | 37 | 35 | SS |
| HP095 | 1185.61  | 486.81  | 0.37* | 0.23*  | 0.22* | 2  | 1  | 34 | 30 | LL |
| HP096 | 1669.47  | 741.55  | 0.03  | -0.1   | 0.07  | 2  | 2  | 49 | 45 | LS |
| HP097 | 1113.19* | 1183.66 | 0.06  | 0.54   | 0.23  | 1  | 0  | 28 | 26 | LS |
| HP098 | 1264.46  | 287.13  | 0.31  | 0.29   | 0.13  | 1  | 4  | 42 | 38 | LS |
| HP100 | 2199.74  | 1136.49 | 0.35  | 0.54   | 0.36  | 2  | 5  | 66 | 49 | LS |

\* Values are not included in the calculations. Reason for excluding these values were missing data of the matched pair, outliers or the values did not achieve the criteria for further analysis (for example LDAEP analysis).
