# Supplementary material for: Investigation of the Serotonergic Activity and the Serotonin Content in Serum and Platelet, and the Possible Role of the Serotonin Transporter in Patients with Depression
Source: MDPI journal article supplement (doi:10.3390/bs12060178), 2022-06-03
Supplement: s1 [file s1]

**Table S3.** Comparison of patients receiving no psychotropic medication with patients who receive psychotropic medications.

|                                               | Without medication   | SSRIs/SNRIs + other psychotropic medication | Other psychotropic medication, without SSRIs/SNRIs | Only SSRIs/SNRIs                       | Only other AD*                      | Only antipsychotics                | SSRIs/SNRIs + other AD*            | SSRIs/SNRIs + antipsychotics        | SSRIs/SNRIs + other AD + antipsychotics |
|-----------------------------------------------|----------------------|---------------------------------------------|----------------------------------------------------|----------------------------------------|-------------------------------------|------------------------------------|------------------------------------|-------------------------------------|-----------------------------------------|
| Serum serotonin (ng/ml) (n)                   | 585.49 ± 501.28 (10) | 135.20 ± 241.27 (56)                        | 345.32 ± 318.10 (22)                               | 111.10 ± 187.19 (20)                   | 384.44 ± 348.19 (6)                 | 362.14 ± 371.64 (8)                | 127.58 ± 264.69 (9)                | 195.88 ± 336.64 (18)                | 221.08 ± 262.82 (13)                    |
| t-test                                        |                      | <i>t</i> (64)=4.49, <i>p</i> <.001***       | <i>t</i> (30)= 1.65 <i>p</i> =.110                 | <i>t</i> (10.26)=2.89, <i>p</i> =.016* | <i>t</i> (14)=.860, <i>p</i> =.404  | <i>t</i> (16)=1.52, <i>p</i> =.148 | <i>t</i> (17)=2.45, <i>p</i> =.026 | <i>t</i> (25)=2.42, <i>p</i> =.023* | <i>t</i> (21)=2.26, <i>p</i> =.035*     |
| Platelet serotonin (10 <sup>9</sup> /Thr) (n) | 655.61 ± 369.36 (7)  | 1123.48 ± 1081.41 (53)                      | 962.65 ± 609.75 (20)                               | 952.54 ± 828.73 (20)                   | 857.98 ± 549.82 (5)                 | 991.23 ± 671.07 (8)                | 1554.04 ± 1384.0 (9)               | 1044.91 ± 1014.88 (18)              | 1441.88 ± 1214.14 (12)                  |
| t-test                                        |                      | <i>t</i> (57)=1.05 <i>p</i> =.300           | <i>t</i> (24)=1.16 <i>p</i> =.257                  | <i>t</i> (24)=.845 <i>p</i> =.407      | <i>t</i> (9)=-.729, <i>p</i> =.485  | <i>t</i> (13)=1.03, <i>p</i> =.323 | <i>t</i> (12)=1.53, <i>p</i> =.151 | <i>t</i> (20)=.905, <i>p</i> =.376  | <i>t</i> (16)=1.53, <i>p</i> =.145      |
| HAMD-21 (n)                                   | 16.00 ± 5.72 (10)    | 18.53 ± 5.12 (57)                           | 19.82 ± 5.00 (22)                                  | 18.10 ± 5.17 (20)                      | 20.00 ± 2.00 (6)                    | 15.75 ± 5.80 (8)                   | 17.00 ± 5.431 (9)                  | 18.61 ± 6.06 (18)                   | 21.54 ± 3.89 (13)                       |
| t-test                                        |                      | <i>t</i> (65)=1.41 <i>p</i> =.162           | <i>t</i> (30)=1.92 <i>p</i> =.064                  | <i>t</i> (28)=.101, <i>p</i> =.320     | <i>t</i> (14)=1.64, <i>p</i> =.124  | <i>t</i> (16)=.665, <i>p</i> =.515 | <i>t</i> (17)=.390, <i>p</i> =.702 | <i>t</i> (26)=1.11, <i>p</i> =.275  | <i>t</i> (21)=2.77, <i>p</i> =.012*     |
| BDI-II (n)                                    | 31.40 ± 11.38 (10)   | 33.07 ± 10.72 (57)                          | 34.55 ± 9.65 (22)                                  | 29.05 ± 11.18 (20)                     | 31.83 ± 7.55 (6)                    | 33.00 ± 9.75 (8)                   | 33.11 ± 11.76 (9)                  | 36.72 ± 10.36 (18)                  | 35.31 ± 8.18 (13)                       |
| t-test                                        |                      | <i>t</i> (65)=.451 <i>p</i> =.654           | <i>t</i> (30)=.808 <i>p</i> =.425                  | <i>t</i> (28)=.540, <i>p</i> =.594     | <i>t</i> (14)=.082, <i>p</i> =.935  | <i>t</i> (16)=.020, <i>p</i> =.984 | <i>t</i> (17)=.322, <i>p</i> =.751 | <i>t</i> (26)=1.24, <i>p</i> =.227  | <i>t</i> (21)=.659, <i>p</i> =.348      |
| STAI-X1 (n)                                   | 53.90 ± 14.10 (10)   | 55.47 ± 11.38 (57)                          | 55.73 ± 14.36 (22)                                 | 51.80 ± 10.19 (20)                     | 53.50 ± 14.54 (6)                   | 55.50 ± 17.07 (8)                  | 55.56 ± 9.07 (9)                   | 56.94 ± 13.63 (18)                  | 54.46 ± 13.94 (13)                      |
| t-test                                        |                      | <i>t</i> (65)= -.389 <i>p</i> =.698         | <i>t</i> (30)=.335 <i>p</i> =.740                  | <i>t</i> (28)=.468, <i>p</i> =.643     | <i>t</i> (14)=.054, <i>p</i> =.957  | <i>t</i> (16)=.271, <i>p</i> =.790 | <i>t</i> (17)=.300, <i>p</i> =.768 | <i>t</i> (26)=5.60, <i>p</i> =.581  | <i>t</i> (21)=.095, <i>p</i> =.925      |
| STAI-X2 (n)                                   | 57.80 ± 13.06 (10)   | 60.93 ± 8.25 (57)                           | 60.68 ± 09.78 (22)                                 | 59.25 ± 7.52 (20)                      | 54.83 ± 10.80 (6)                   | 63.13 ± 11.09 (8)                  | 63.11 ± 4.73 (9)                   | 61.39 ± 10.262 (18)                 | 13.06 ± 9.45 (13)                       |
| t-test                                        |                      | <i>t</i> (65)=1.01 <i>p</i> =.318           | <i>t</i> (30)=.739 <i>p</i> =.466                  | <i>t</i> (28)=.388, <i>p</i> =.701     | <i>t</i> (14)=.467, <i>p</i> =.648  | <i>t</i> (16)=.785, <i>p</i> =.444 | <i>t</i> (17)=1.15, <i>p</i> =.266 | <i>t</i> (26)=.805, <i>p</i> =.428  | <i>t</i> (21)=.404, <i>p</i> =.690      |
| Cortical LDAEP (n)                            | 0.291 ± 0.160 (9)    | 0.242 ± 0.180 (53)                          | 0.289 ± 0.215 (19)                                 | 0.289 ± 0.195 (17)                     | 0.380 ± 0.299 (6)                   | 0.290 ± 0.174 (7)                  | 0.147 ± 0.115 (7)                  | 0.281 ± 0.211 (15)                  | 0.237 ± 0.150 (11)                      |
| t-test                                        |                      | <i>t</i> (55)=.589 <i>p</i> =.559           | <i>t</i> (26)=.040 <i>p</i> =.969                  | <i>t</i> (24)=.030, <i>p</i> =.976     | <i>t</i> (13)=-.754, <i>p</i> =.464 | <i>t</i> (14)=.300, <i>p</i> =.768 | <i>t</i> (14)=1.99, <i>p</i> =.067 | <i>t</i> (22)=.128, <i>p</i> =.900  | <i>t</i> (18)=.755, <i>p</i> =.448      |
| Source LDAEP (left) (n)                       | 0.280± 0.173 (9)     | 0.204 ± 0.220 (53)                          | 0.229 ± 0.283 (19)                                 | 0.216 ± 0.212 (17)                     | 0.398 ± 0.461 (6)                   | 0.141 ± 0.099 (7)                  | 0.257 ± 0.343 (7)                  | 0.248 ± 0.198 (15)                  | 0.114 ± 0.135 (11)                      |
| t-test                                        |                      | <i>t</i> (55)=.852 <i>p</i> =.398           | <i>t</i> (26)=.496 <i>p</i> =.624                  | <i>t</i> (24)=.779, <i>p</i> =.444     | <i>t</i> (13)=.710, <i>p</i> =.490  | <i>t</i> (14)=1.07, <i>p</i> =.303 | <i>t</i> (14)=1.75, <i>p</i> =.864 | <i>t</i> (22)=.460, <i>p</i> =.650  | <i>t</i> (15)=2.36, <i>p</i> =.032*     |
| Source LDAEP (right) (n)                      | 0.176 ± 0.080 (9)    | 0.200 ± 0.247 (53)                          | 0.148 ± 0.230 (19)                                 | 0.141 ± 0.146 (17)                     | 0.248 ± 0.381 (6)                   | 0.074 ± 0.073 (7)                  | 0.124 ± 0.093 (7)                  | 0.205 ± 0.159 (15)                  | 0.211 ± 0.342 (11)                      |
| t-test                                        |                      | <i>t</i> (55)=.367 <i>p</i> =.715           | <i>t</i> (26)=.388 <i>p</i> =.701                  | <i>t</i> (24)=.094, <i>p</i> =.924     | <i>t</i> (13)=.565, <i>p</i> =.582  | <i>t</i> (14)=1.88, <i>p</i> =.081 | <i>t</i> (14)=1.19, <i>p</i> =.255 | <i>t</i> (22)=.510, <i>p</i> =.615  | <i>t</i> (18)=.302, <i>p</i> =.766      |

\*other antidepressants (AD) = tetracyclic and tricyclic antidepressants. \* *p* < .05, \*\* *p* < .01, \*\*\* *p* < .001.
