# Supplementary material for: Investigation of the Serotonergic Activity and the Serotonin Content in Serum and Platelet, and the Possible Role of the Serotonin Transporter in Patients with Depression
Source: MDPI journal article supplement (doi:10.3390/bs12060178), 2022-06-03
Supplement: s1 [file s1]

**Table S2.** Derivation of applied medication of patient with depression.

| Medication                                                  | Patients with depression |
|-------------------------------------------------------------|--------------------------|
| Number of subjects                                          | 89                       |
| <b>Medication</b>                                           |                          |
| Only SSRIs/SNRIs (n/%)                                      | 20 (22.5)                |
| Only antipsychotics (n/%)                                   | 8 (9.0)                  |
| Only other antidepressants* <sup>1</sup> (n/%)              | 6 (6.7)                  |
| SSRIs/SNRIs + antipsychotics (n/%)                          | 18 (20.2)                |
| SSRIs/SNRIs + other antidepressants* (n/%)                  | 9 (10.1)                 |
| SSRIs/SNRIs + other antidepressants* + antipsychotics (n/%) | 13 (14.6)                |
| Lithium (n/%)                                               | 2 (2.2)                  |
| Benzodiazepine (n/%)                                        | 5 (5.6)                  |
| Melatonin receptor antagonist (n/%)                         | 6 (6.7)                  |
| Z-Substance (n/%)                                           | 2 (2.2)                  |
| Anticonvulsants (n/%)                                       | 2 (2.2)                  |
| Herbal antidepressants (n/%)                                | 1 (1.1)                  |

\*<sup>1</sup> other antidepressants= tricyclic- and tetracyclic antidepressants.
